# Supplementary material
Source: PubMed Central journal article supplement (PMC5836256)
Supplement: mnp-0003-0157-s02.pdf [file mnp-0003-0157-s02.pdf]

**Supplementary Table 2.** Listing of positive compounds detected by profiling of cerebellar tissue at NMS. There were a total of 250 positive medication/drug detections, few subjects had single medications detected. To preserve privacy, only aggregate data, not individual data are shown.

| Number of Positive Brains | Toxicology Screen-NMS                       | Antipsychotic | Antidepressant | Mood Stabilizer | Anxiolytic |
|---------------------------|---------------------------------------------|---------------|----------------|-----------------|------------|
| 9                         | Acetaminophen                               | 0             | 0              | 0               | 0          |
| 1                         | Acetone                                     | 0             | 0              | 0               | 0          |
| 4                         | Alprazolam                                  | 0             | 0              | 0               | 1          |
| 6                         | Amitriptyline                               | 0             | 1              | 0               | 1          |
| 1                         | Amoxapine                                   | 0             | 1              | 0               | 0          |
| 5                         | Amphetamine                                 | 0             | 0              | 0               | 0          |
| 1                         | Benzoyllecgonine                            | 0             | 0              | 0               | 0          |
| 3                         | Benzotropine                                | 0             | 0              | 0               | 0          |
| 1                         | Buprenorphine                               | 0             | 0              | 0               | 0          |
| 5                         | Bupropion                                   | 0             | 1              | 0               | 0          |
| 34                        | Caffeine                                    | 0             | 0              | 0               | 0          |
| 1                         | Chlorpheniramine                            | 1             | 0              | 0               | 0          |
| 3                         | Citalopram                                  | 0             | 1              | 0               | 0          |
| 8                         | Clozapine                                   | 1             | 0              | 0               | 0          |
| 2                         | Codeine                                     | 0             | 0              | 0               | 0          |
| 4                         | Cyclobenzaprine                             | 0             | 0              | 0               | 0          |
| 1                         | Desmethyldoxepin                            | 0             | 1              | 0               | 1          |
| 13                        | Diazepam                                    | 0             | 0              | 0               | 1          |
| 1                         | Diltiazem                                   | 0             | 0              | 0               | 0          |
| 1                         | Diphenhydramine                             | 0             | 0              | 0               | 0          |
| 2                         | Doxepin                                     | 0             | 1              | 0               | 0          |
| 1                         | Duloxetine                                  | 0             | 1              | 0               | 0          |
| 3                         | Ephedrine                                   | 0             | 0              | 0               | 0          |
| 1                         | Ethanol                                     | 0             | 0              | 0               | 0          |
| 7                         | Fluoxetine                                  | 0             | 1              | 0               | 1          |
| 3                         | Flurazepam                                  | 0             | 0              | 0               | 1          |
| 2                         | Haloperidol                                 | 1             | 0              | 0               | 0          |
| 4                         | Hydrocodone                                 | 0             | 0              | 0               | 0          |
| 5                         | Hydroxyzine (non benzodiazepine anxiolytic) | 0             | 0              | 0               | 1          |
| 1                         | Isopropanol                                 | 0             | 0              | 0               | 0          |
| 1                         | Lamotrigine                                 | 0             | 0              | 1               | 0          |
| 8                         | Lidocaine                                   | 0             | 0              | 0               | 0          |
| 2                         | Lorazepam                                   | 0             | 0              | 0               | 1          |
| 1                         | Methadone                                   | 0             | 0              | 0               | 0          |
| 3                         | Methamphetamine                             | 0             | 0              | 0               | 0          |

| Number of Positive Brains | Toxicology Screen-NMS | Antipsychotic | Antidepressant | Mood Stabilizer | Anxiolytic |
|---------------------------|-----------------------|---------------|----------------|-----------------|------------|
| 1                         | Methorphan            | 0             | 0              | 0               | 0          |
| 4                         | Mirtazapine           | 0             | 1              | 0               | 0          |
| 5                         | Morphine              | 0             | 0              | 0               | 0          |
| 1                         | Nicotine              | 0             | 0              | 0               | 0          |
| 6                         | Nortriptyline         | 0             | 0              | 0               | 1          |
| 2                         | Oxazepam              | 0             | 0              | 0               | 1          |
| 4                         | Oxycodone             | 0             | 0              | 0               | 0          |
| 2                         | Paroxetine            | 0             | 1              | 0               | 0          |
| 2                         | Promethazine          | 1             | 0              | 0               | 0          |
| 7                         | Quetiapine            | 1             | 1              | 0               | 0          |
| 1                         | Quinine               | 0             | 0              | 0               | 0          |
| 14                        | Sertraline            | 0             | 1              | 0               | 0          |
| 2                         | Temazepam             | 0             | 0              | 0               | 1          |
| 1                         | Theophylline          | 0             | 0              | 0               | 0          |
| 4                         | Tramadol              | 0             | 0              | 0               | 0          |
| 1                         | Trimethoprim          | 0             | 0              | 0               | 0          |
| 3                         | Venlafaxine           | 0             | 1              | 0               | 1          |
| 2                         | Verapamil             | 0             | 0              | 0               | 0          |
