# Supplementary material
Source: PubMed Central journal article supplement (PMC5836256)

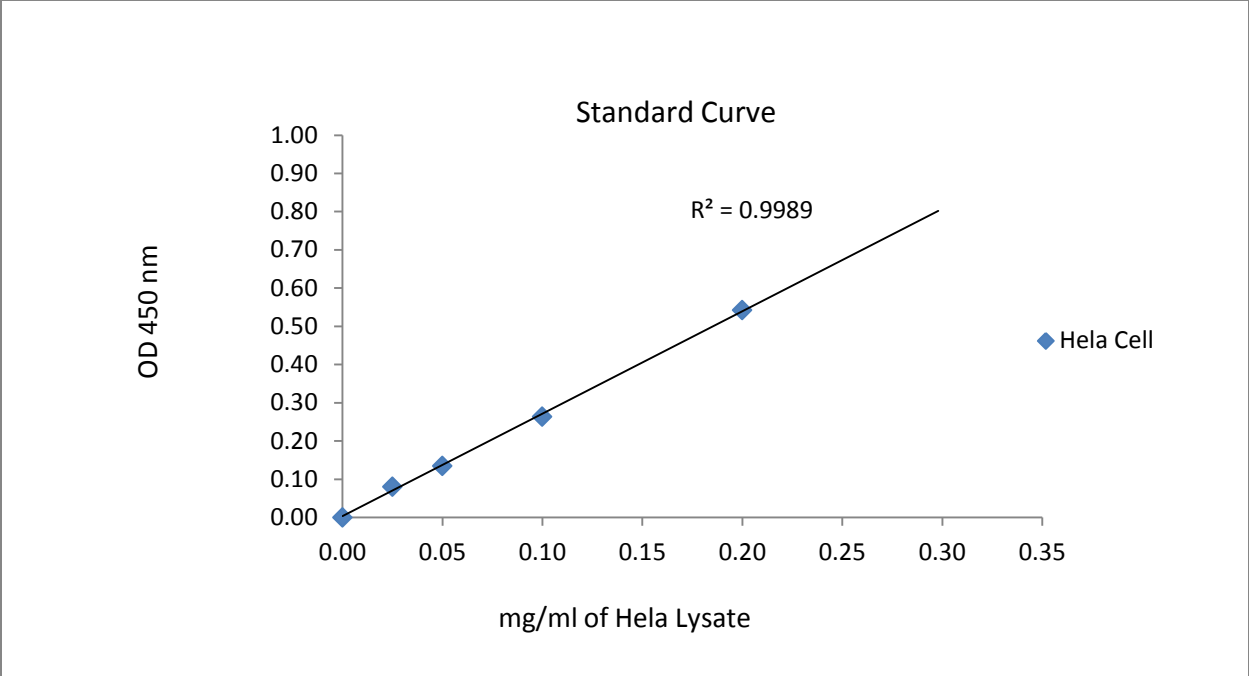

**Supplementary Figure 1.** The Complex I ELISA standard curve was prepared as described in the Methods section. The standard curve showing the linear range  $R^2$  of 0.9989, y-axis is an average of OD at 450 nm; x-axis is the concentration (mg/ml) of Hela lysate for each standard. Standard curves were prepared for each 96-well assay plate.

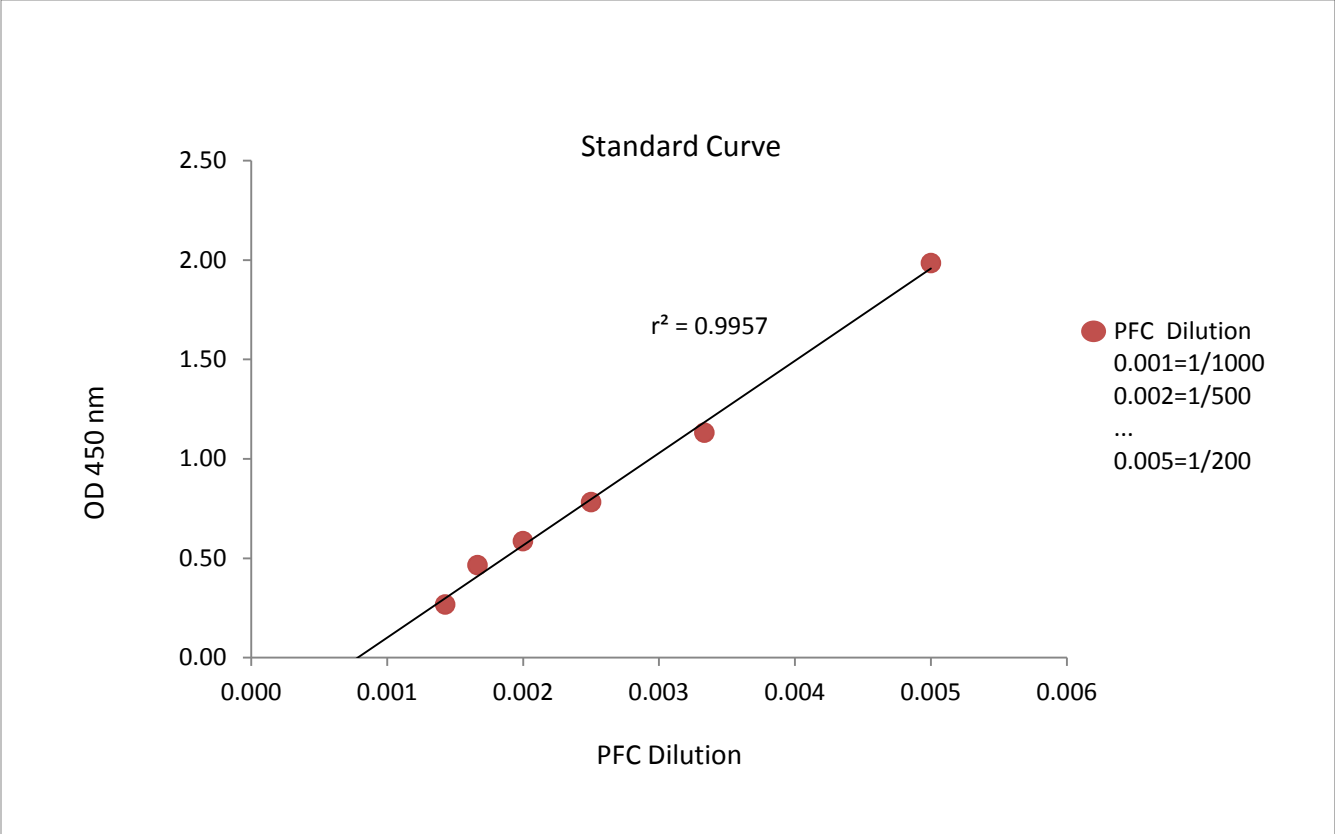

**Supplementary Figure 2.** The Complex I ELISA standard curve was prepared as described in the Methods section. The standard curve showing the linear range  $r^2$  of 0.9957, y-axis is an average of OD at 450 nm; x-axis is the dilution factor of a PFC extract showing the linear range of dilutions for postmortem brain.

**Supplementary Figure 3.** Complex I activity for two samples of PFC extracted protein. Samples were assayed at varying total protein (50 µg - 300 µg range). It is noted that the activity and protein µg is approximately linear fit around the midpoint range of ~100 µg, which was selected as the target range for the activity assay. It can be seen that the activity for Subject 2 is about 4x less than the activity of Subject 1 for the same µg of protein.

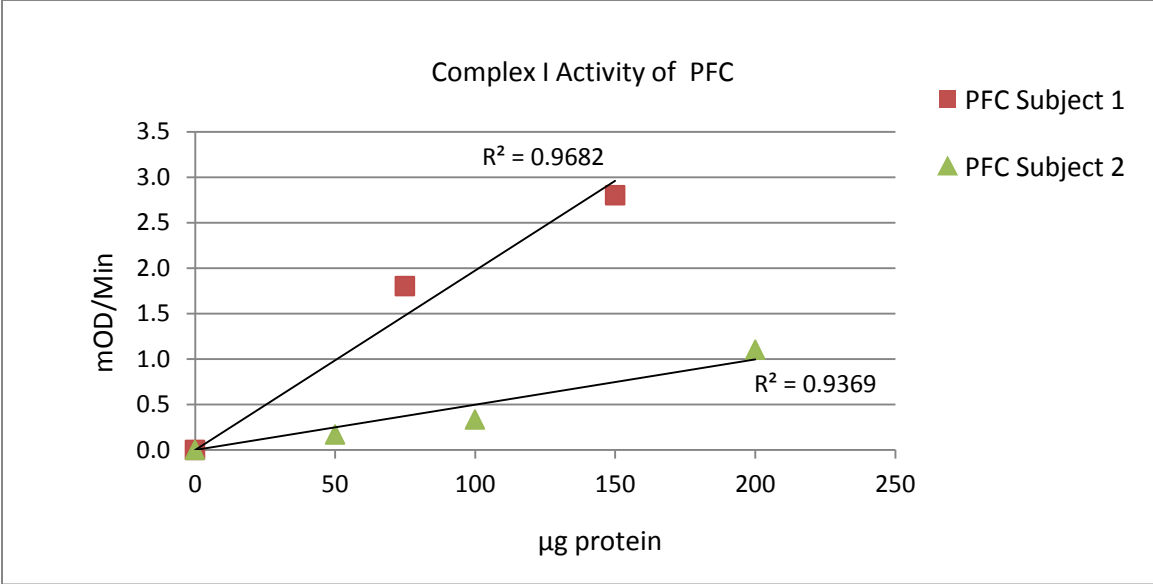

**Supplementary Figure 4.** Two regression lines are fit to a number of medications and psychotropic drugs (x-axis) by Complex I activity (y-axis) for PFC samples. The regression lines appear parallel, indicating similar effects for BD and SZ.

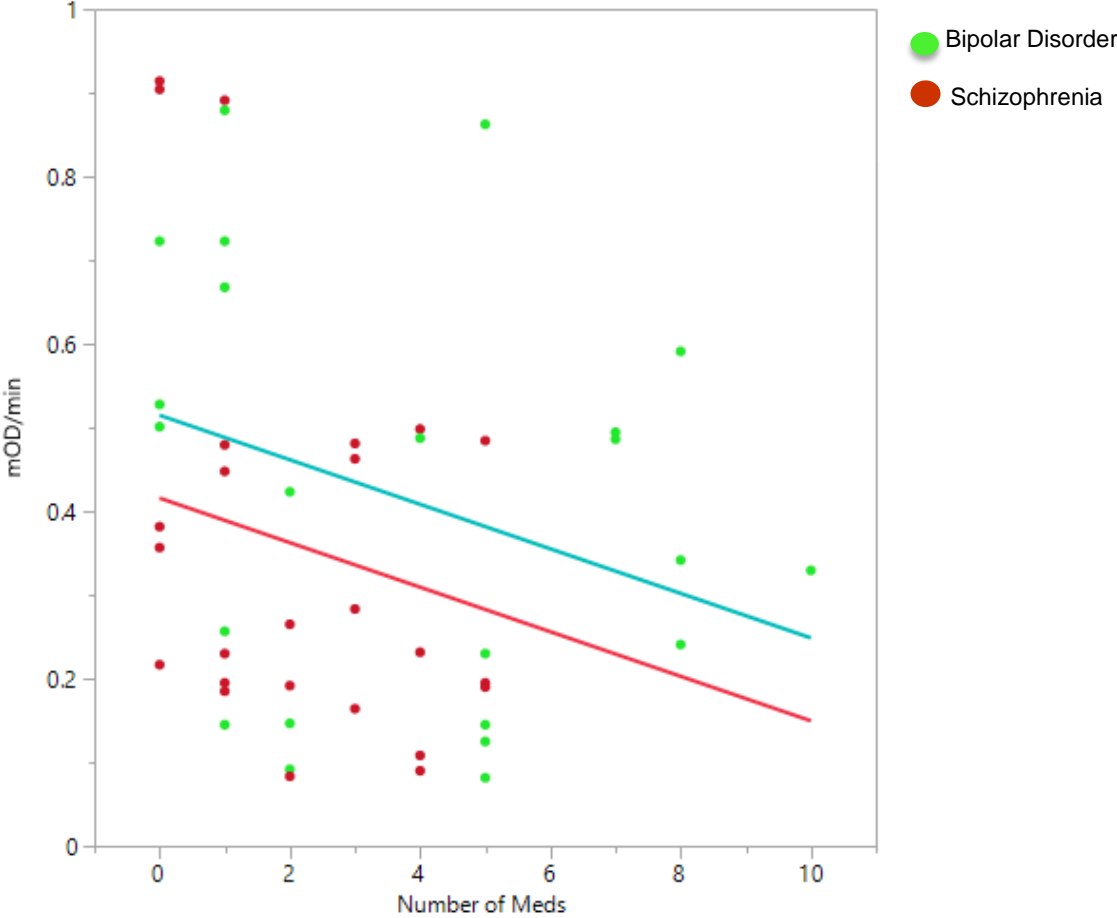

Supplement: mnp-0003-0157-s03.pdf [file mnp-0003-0157-s03.pdf]
